# Supplementary material for: Synthesis and Characterization of Novel Cobalt Carbonyl Phosphorus and Arsenic Clusters
Source: MDPI journal article supplement (doi:10.3390/molecules29092025), 2024-04-27
Supplement: s1 [file s1]

## Supporting Information

### **Synthesis and characterization of novel cobalt carbonyl phosphorus and arsenic clusters**

Mehdi Elsayed Moussa,<sup>†</sup> Susanne Bauer,<sup>†</sup> Christian Graßl, Christoph Riesinger, Gábor Balázs and Manfred Scheer<sup>a\*</sup>

Department of Inorganic Chemistry, University of Regensburg, GER-93040 Regensburg  
(Germany)

<sup>†</sup> Authors contributed equally to this work

## 1. Synthesis and characterization of compound 1:

A solution of  $\text{W}(\text{CO})_6$  (2.5 g, 7.1 mmol) in THF (250 mL) was irradiated for five hours with a mercury vapor lamp. THF was removed under reduced pressure and the residue was solved in toluene (250 mL). To this solution  $\text{As}(\text{SiMe}_3)_3$  (2.1 mL, 7.1 mmol) was added and the mixture was stirred for nine days at room temperature. Subsequently MeOH (1 mL, 26 mmol) was added and the solution was stirred for further three days (**2**) at room temperature. After removing the solvent under reduced pressure, crystals were obtained by sublimation of the residual solids at 45 °C at  $10^{-3}$  mbar. Yield: 1.284 g (45 %). IR (KBr):  $\tilde{\nu}/\text{cm}^{-1}$  = 2079 (m), 1990 (m), 1908 (br vs), 2196 (m), 903 (s), 577 (m).  $^1\text{H}$  NMR (400.132 MHz,  $\text{C}_6\text{D}_6$ ):  $\delta[\text{ppm}]$  = 1.56 (s, 3 H,  $\text{AsH}_3$ ).  $^{13}\text{C}\{^1\text{H}\}$  NMR (100.613 MHz,  $\text{C}_6\text{D}_6$ ):  $\delta[\text{ppm}]$  = 195.7 (s,  $^1J_{\text{CW}}$  = 125.6 Hz, CO), 198.1 (s, CO). EI-MS (70 eV):  $m/z$  (%) = 401.8 (83) [ $\text{M}^+$ ], 373.8 (18) [ $\text{M}^+ - \text{CO}$ ], 345.8 (52) [ $\text{M}^+ - 2 \text{CO}$ ], 315.8 (96) [ $\text{M}^+ - 3 \text{CO} - 2 \text{H}$ ], 286.8 (58) [ $\text{M}^+ - 4 \text{CO} - 3 \text{H}$ ], 258.8 (35) [ $\text{M}^+ - 5 \text{CO} - 3 \text{H}$ ]. Anal. Calcd for  $\text{CrC}_5\text{O}_5\text{AsH}_3$  (269.86 g/mol): C, 22.24; H, 1.12. Found C, 22.80; H, 1.17 (**1**). Elemental analysis, calcd. for  $\text{WC}_5\text{O}_5\text{AsH}_3$  (401.87 g/mol): C, 14.94; H, 0.75. Found C, 14.98; H, 0.63.

## 2. NMR spectra of compounds 1-4, 6-9 and A:

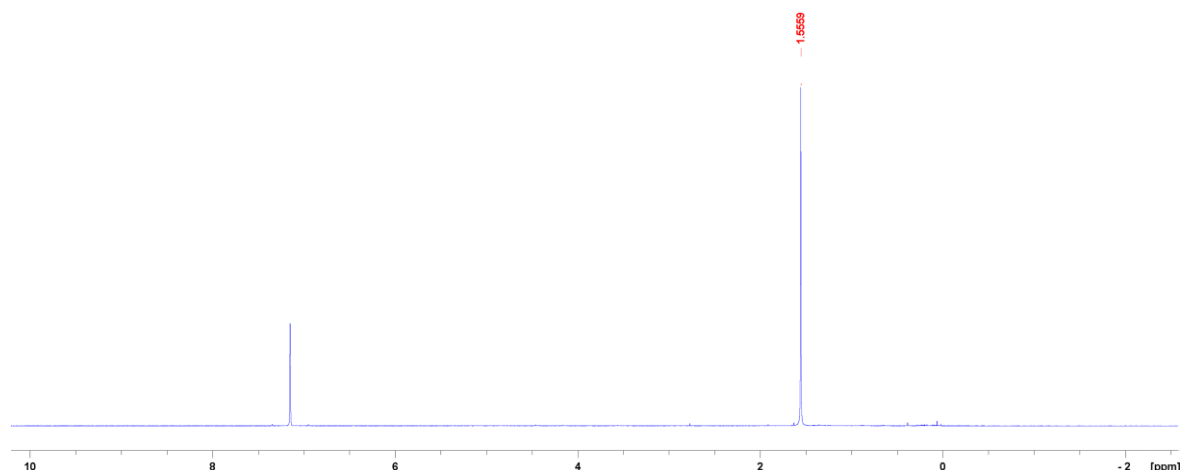

Figure S1.  $^1\text{H}$  NMR spectrum of **1**.

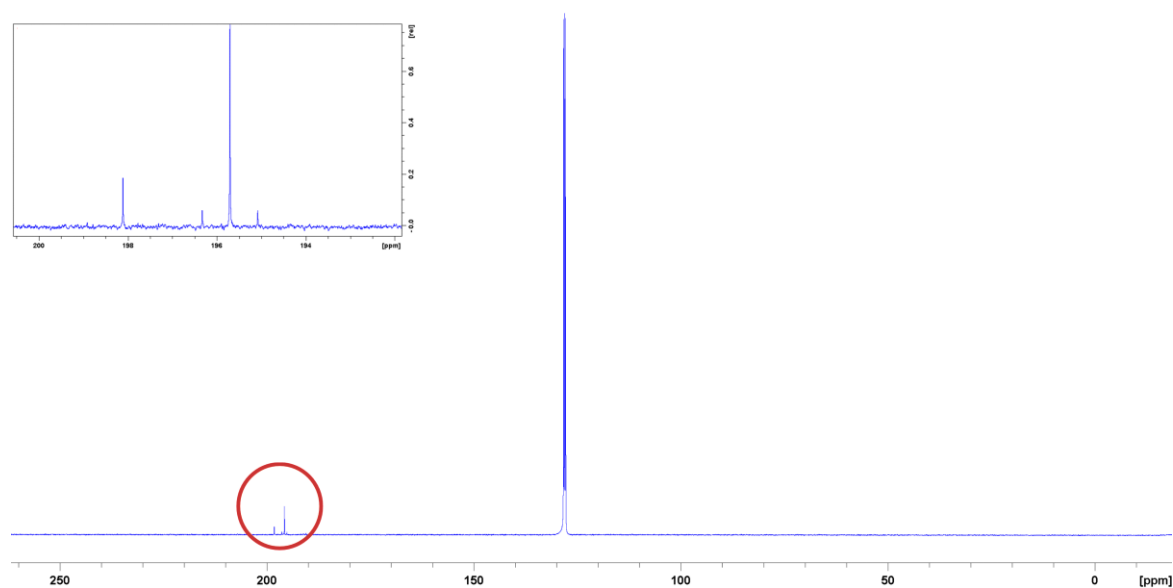

Figure S2.  $^{13}\text{C}\{^1\text{H}\}$  NMR spectrum of **1**.

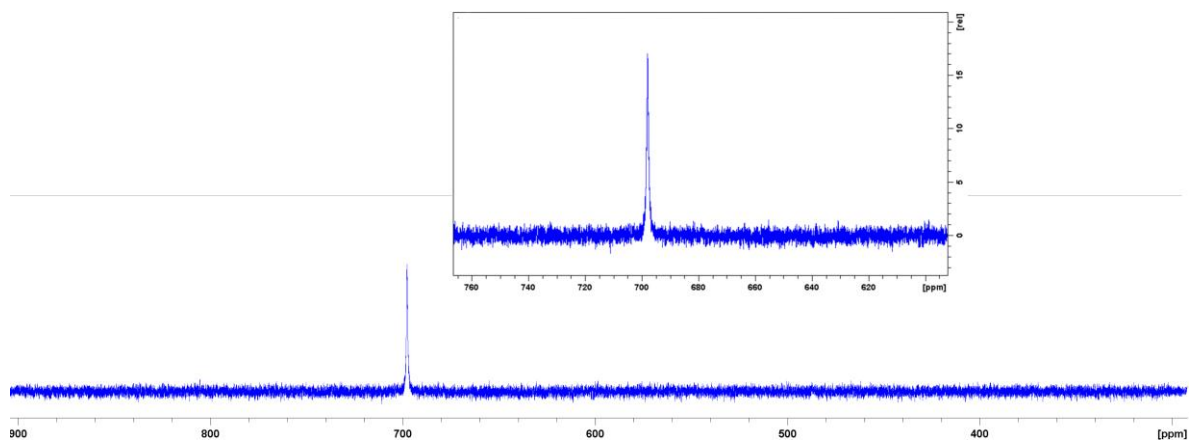

**Figure S3.**  $^{31}\text{P}\{^1\text{H}\}$  NMR spectrum of **2**.

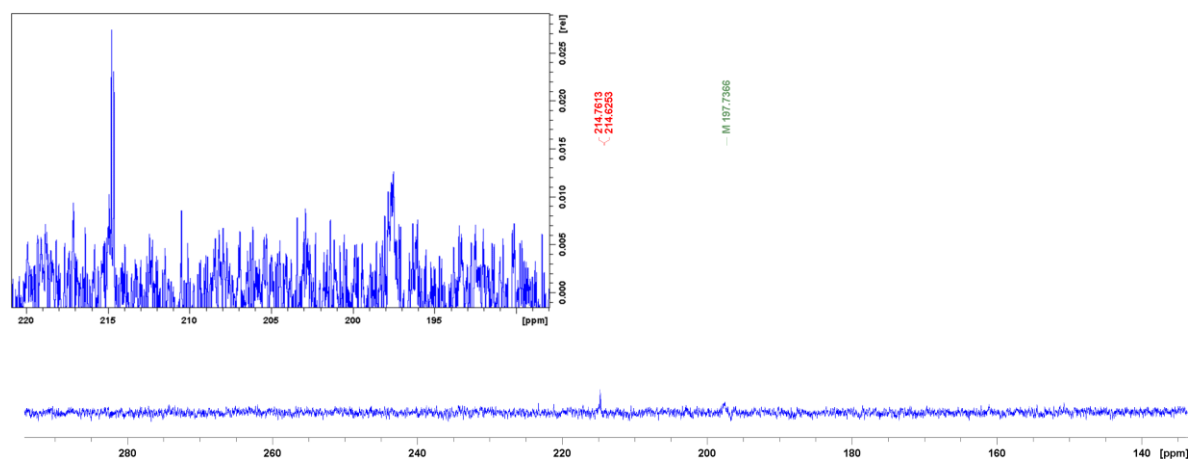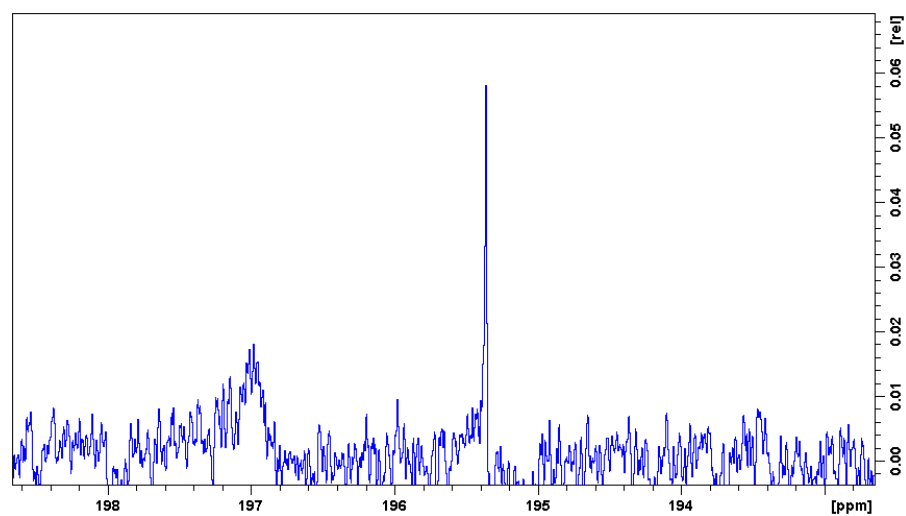

**Figure S4.**  $^{13}\text{C}\{^1\text{H}\}$  NMR spectrum of **2** (above) and **3** (below).

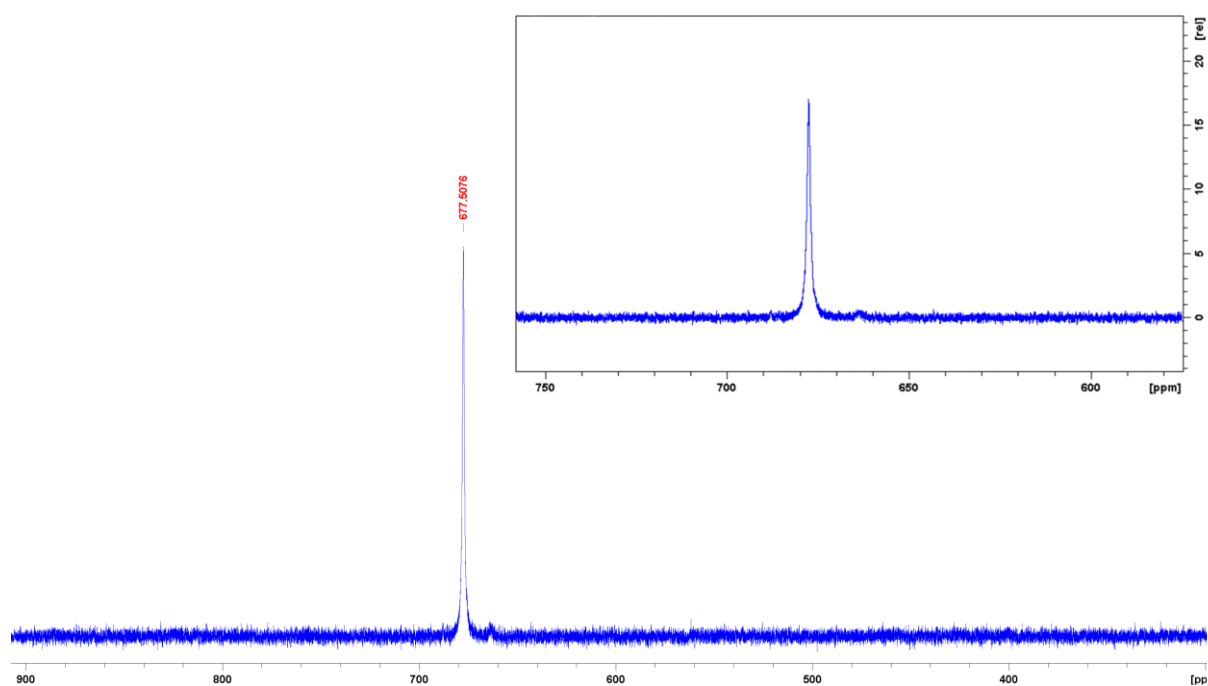

**Figure S5.**  $^{31}\text{P}\{^1\text{H}\}$  NMR spectrum of **4**.

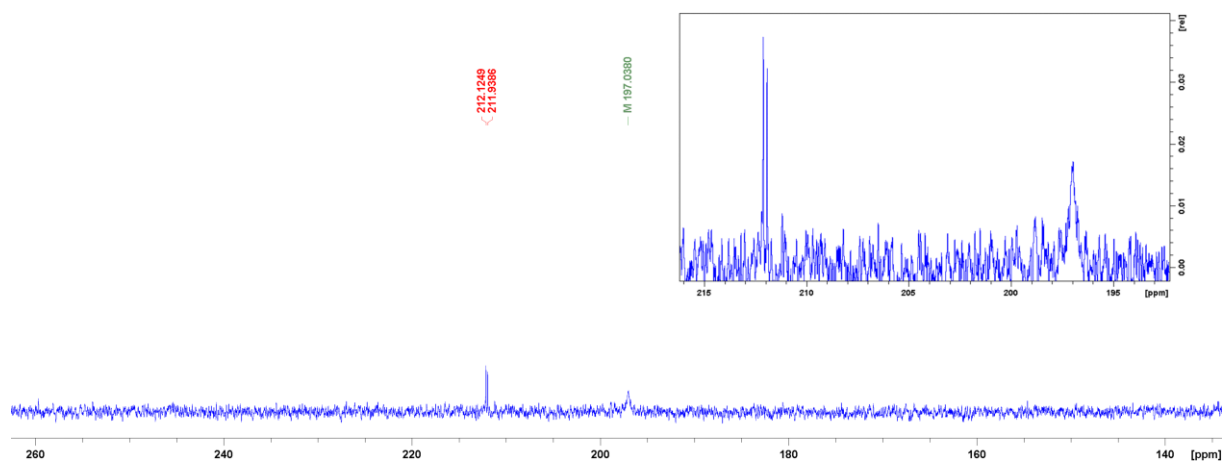

**Figure S6.**  $^{13}\text{C}\{^1\text{H}\}$  NMR spectrum of **4**.

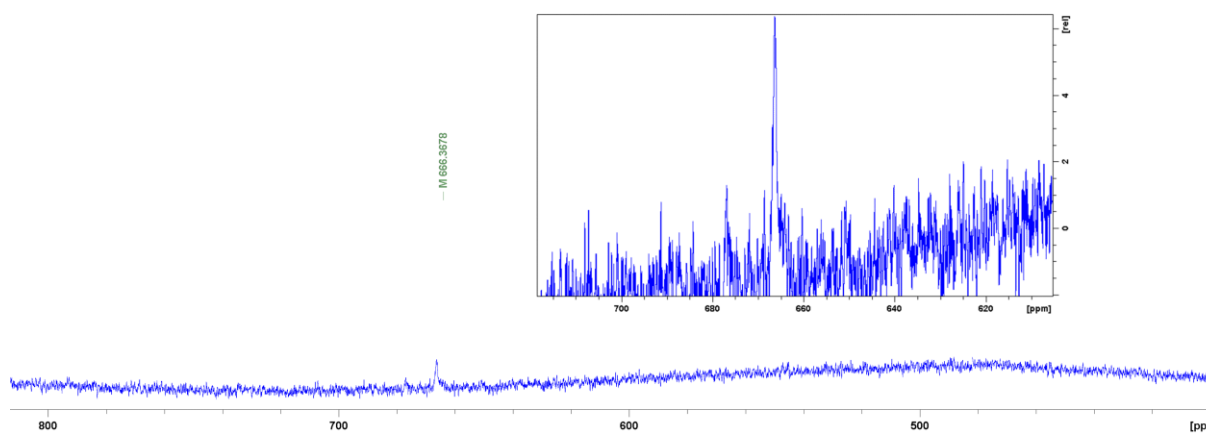

**Figure S7.**  $^{31}\text{P}\{^1\text{H}\}$  NMR spectrum of **6**.

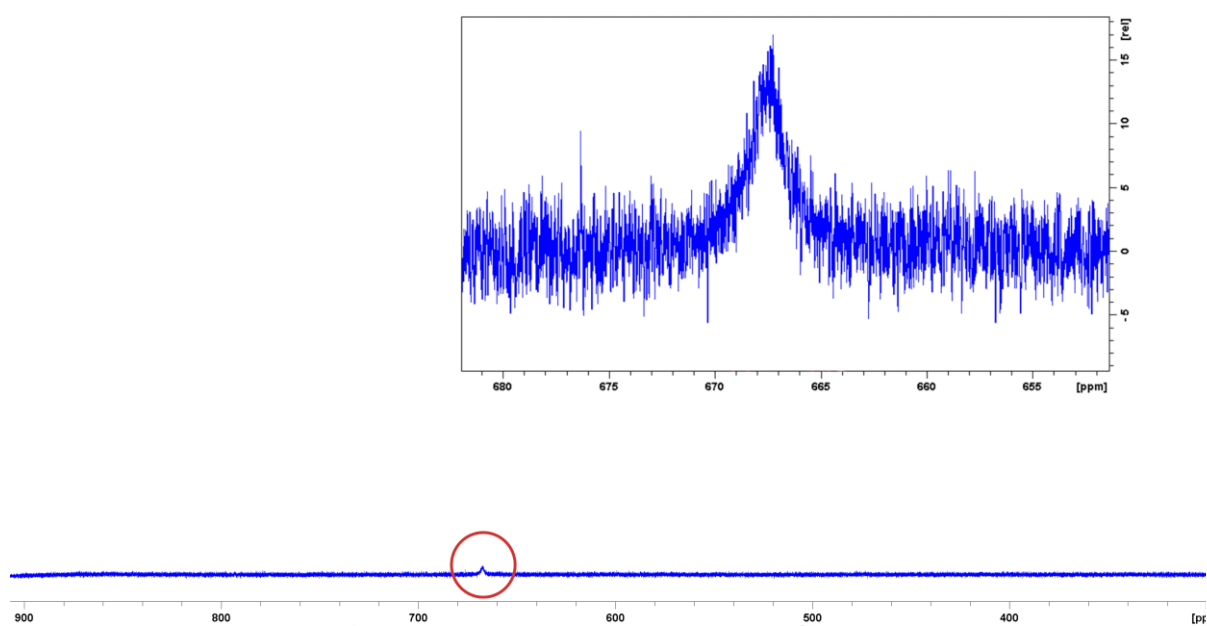

**Figure S8.**  $^{31}\text{P}\{^1\text{H}\}$  NMR spectrum of **7**.

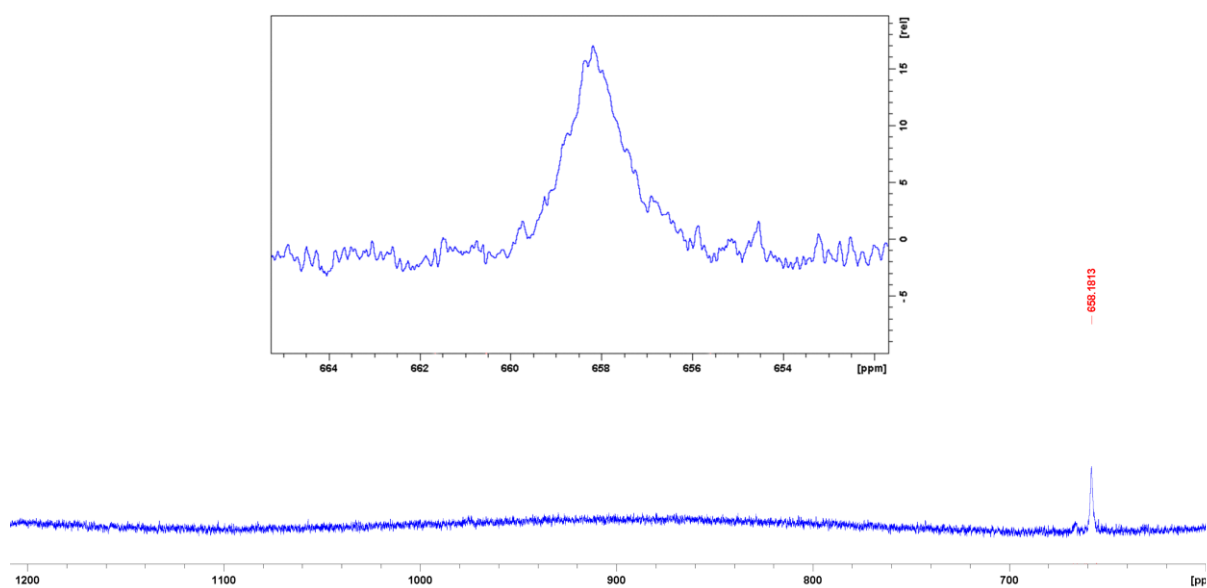

**Figure S9.**  $^{31}\text{P}\{^1\text{H}\}$  NMR spectrum of **8**.

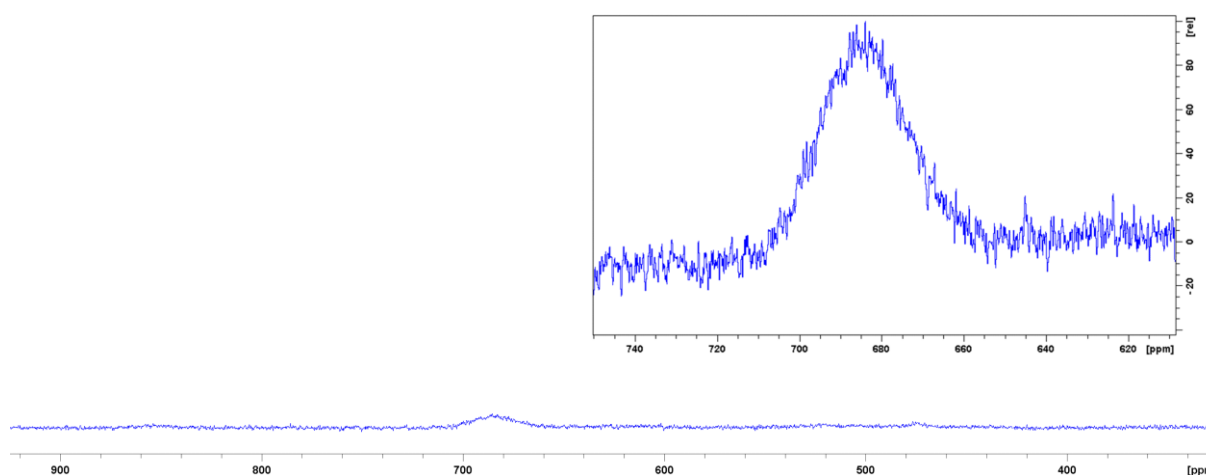

**Figure S10.**  $^{31}\text{P}\{^1\text{H}\}$  MAS NMR spectrum of **9**.

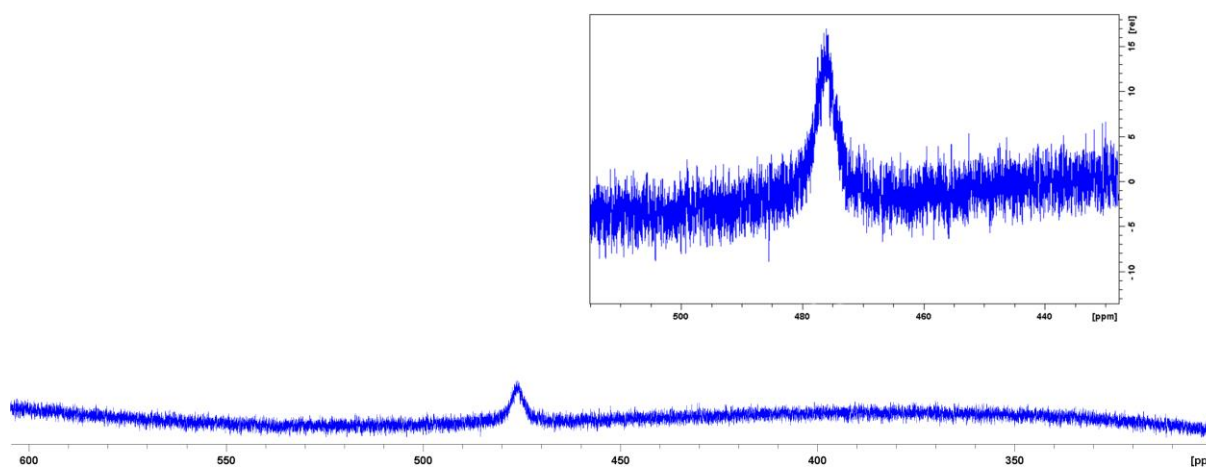

**Figure S11.**  $^{31}\text{P}\{^1\text{H}\}$  NMR spectrum of **A**.

### 3. DFT calculations for cluster 5:

All calculations have been performed using ORCA program, version 5.0.3.<sup>[1]</sup> For the geometry optimization and frequency analysis the  $r^2\text{SCAN-3c}$ <sup>[2]</sup> composite method has been used, which includes geometrical counterpoise correction  $\text{gCP}$ <sup>[3]</sup> and the atom-pairwise dispersion correction based on tight binding partial charges ( $\text{D4}$ )<sup>[4]</sup> as well as the def2-mTZVPP auxiliary and orbital basis set.<sup>[2]</sup>

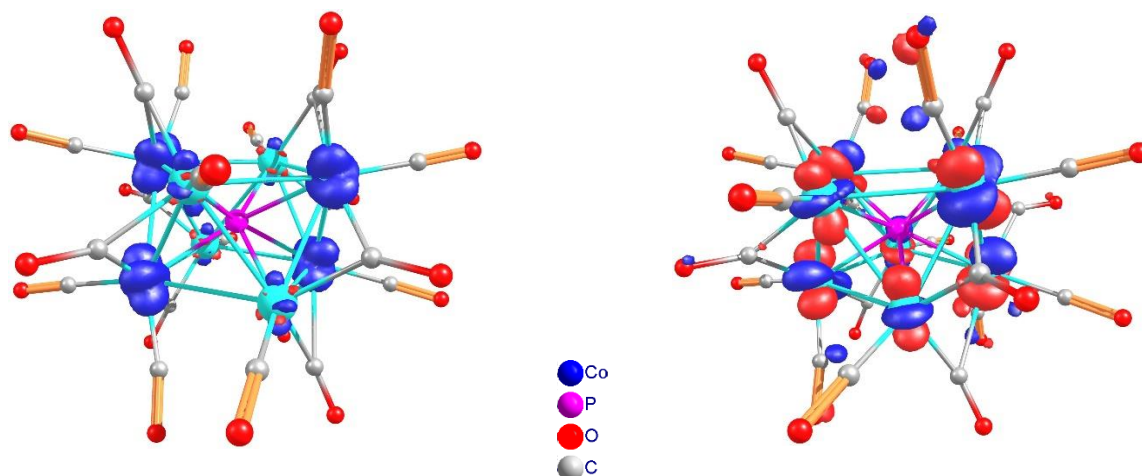

**Figure S12.** Spin density distribution (left) and singly occupied natural orbital in  $[\text{Co}_8(\text{CO})_{16}(\mu\text{-CO})_4\text{P}]$  (**5**) in the doublet ground state, calculated on the  $r^2\text{SCAN-3c}$  level (right).

**Table S1.** Thermodynamic parameters (Hartree) calculated for **5** in different spin states at the  $r^2\text{SCAN-3c}$  level of theory.

|                         | Doublet      | Quartet      |
|-------------------------|--------------|--------------|
| Electronic energy       | -13670.85694 | -13670.83486 |
| Total thermal energy    | -13670.6203  | -13670.59948 |
| Total Enthalpy          | -13670.61936 | -13670.59854 |
| Final entropy term      | 0.14625567   | 0.14938362   |
| Final Gibbs free energy | -13670.76561 | -13670.74792 |

Cartesian coordinates of the optimized geometry of **5** in the doublet ground state.

|    |                   |                   |                   |
|----|-------------------|-------------------|-------------------|
| P  | -0.00689087811709 | 0.01781563073716  | -0.00698516371747 |
| Co | 1.47113072242262  | -0.43231674132434 | -1.63228177612458 |
| Co | -0.88926142695194 | -1.65693061002599 | -1.18112330031444 |
| Co | -2.04354991986912 | 0.81340952242140  | -0.50419627120172 |
| Co | 0.33239944486580  | 2.03673055781503  | -0.87996841827351 |
| Co | 1.06275230017859  | -1.86948141566769 | 0.55904409895613  |
| Co | -1.48254723317514 | -0.96346995104361 | 1.34162431822358  |
| Co | -0.52821459249870 | 1.54788978276751  | 1.55107255713748  |
| Co | 2.00809202547704  | 0.65292840929022  | 0.69452753892558  |
| C  | 2.38707261774865  | -1.74120272228376 | -2.41763876558329 |
| C  | 1.35974291508269  | 0.69890165236333  | -3.01073921231347 |
| C  | 3.10525653974935  | 0.22376085521130  | -0.79801601821159 |
| C  | -2.36858023848004 | -2.62568170782218 | -1.31938420774495 |
| C  | -0.37878719322265 | -1.63450563294314 | -2.88650373880650 |
| C  | 0.11602581915524  | -3.14986640534624 | -0.56301231704483 |
| C  | -2.68113580776127 | 0.15134419356700  | -2.03642862762186 |
| C  | -3.13005103578248 | 2.21379013978549  | -0.33854722381433 |
| C  | -3.12408323288351 | -0.19293963097518 | 0.76407652146175  |
| C  | 1.63900219974243  | 3.10823090338180  | -1.41724385113345 |
| C  | -0.92759221705627 | 2.48270621251858  | -2.05516933441776 |
| C  | -0.12830996360704 | 3.18330107858380  | 0.55977740836028  |
| C  | 2.56811958145972  | -2.79858260124303 | 0.36434906194400  |
| C  | 0.57969098024872  | -2.45835322258430 | 2.17591729404360  |
| C  | -1.40244677088192 | -0.30418616008550 | 2.99435990541901  |

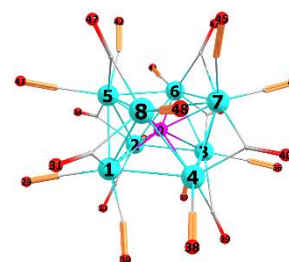

|   |                   |                   |                   |
|---|-------------------|-------------------|-------------------|
| C | -2.25618412978075 | -2.52374639035135 | 1.67735371690579  |
| C | 0.70174889957957  | 1.68017026583582  | 2.84053579869464  |
| C | -1.88146734814378 | 2.37276876534467  | 2.36239174965479  |
| C | 2.68468300134903  | -0.46484820038171 | 1.90313776153444  |
| C | 2.95689218248607  | 2.10250467598814  | 1.07391991701454  |
| O | 2.97948342438390  | -2.55668553314067 | -2.95651065583532 |
| O | 1.40752256520394  | 1.25804325301420  | -4.01260965760509 |
| O | 4.23103032529364  | 0.30577138501735  | -1.09412806368816 |
| O | -3.31797274968987 | -3.25267948116315 | -1.43801392145898 |
| O | -0.31079915245669 | -1.81436186165607 | -4.02289984528175 |
| O | 0.16013571626891  | -4.30006167976263 | -0.75499536658423 |
| O | -3.24559584860880 | -0.07426264106704 | -3.01118909927878 |
| O | -3.84977166695981 | 3.09867545707062  | -0.26685710295740 |
| O | -4.25713257896892 | -0.27249758404781 | 1.03192190549094  |
| O | 2.46578149510963  | 3.80747142643694  | -1.78618386015016 |
| O | -1.51240949882414 | 2.98721538301479  | -2.91068710839341 |
| O | -0.16377697953223 | 4.32879630598297  | 0.77950182367110  |
| O | 3.52520145713105  | -3.41683423863225 | 0.27469931006444  |
| O | 0.48751737672642  | -2.96915742171267 | 3.20085886298878  |
| O | -1.51766541064883 | -0.17767726628737 | 4.13479127865943  |
| O | -2.75635617151135 | -3.52307101121780 | 1.92112158030324  |
| O | 1.31646814818605  | 1.87397120251329  | 3.79096555647388  |
| O | -2.72355840058364 | 2.91300418656399  | 2.91491975285454  |
| O | 3.31740728725749  | -0.92499909584859 | 2.74974695168417  |
| O | 3.58148342088945  | 3.02199796138863  | 1.34359823709091  |

-----  
MULLIKEN ATOMIC CHARGES AND SPIN POPULATIONS  
-----

|       |           |           |
|-------|-----------|-----------|
| 0 P : | 0.478188  | -0.069218 |
| 1 Co: | -0.541429 | 0.251200  |
| 2 Co: | -0.540763 | 0.020036  |
| 3 Co: | -0.541199 | 0.251499  |
| 4 Co: | -0.541762 | 0.025440  |
| 5 Co: | -0.541697 | 0.244299  |
| 6 Co: | -0.540411 | 0.022489  |
| 7 Co: | -0.548325 | 0.246757  |
| 8 Co: | -0.539466 | 0.030281  |

Mayer bond orders larger than 0.100000

|                    |         |                    |        |                    |         |
|--------------------|---------|--------------------|--------|--------------------|---------|
| B( 0-P , 1-Co) :   | 0.4147  | B( 0-P , 2-Co) :   | 0.4267 | B( 0-P , 3-Co) :   | 0.4132  |
| B( 0-P , 4-Co) :   | 0.4290  | B( 0-P , 5-Co) :   | 0.4141 | B( 0-P , 6-Co) :   | 0.4255  |
| B( 0-P , 7-Co) :   | 0.4131  | B( 0-P , 8-Co) :   | 0.4272 | B( 0-P , 11-C ) :  | -0.1006 |
| B( 0-P , 20-C ) :  | -0.1001 | B( 1-Co, 2-Co) :   | 0.3255 | B( 1-Co, 4-Co) :   | 0.2587  |
| B( 1-Co, 5-Co) :   | 0.3241  | B( 1-Co, 8-Co) :   | 0.3174 | B( 1-Co, 9-C ) :   | 1.1555  |
| B( 1-Co, 10-C ) :  | 1.1796  | B( 1-Co, 11-C ) :  | 0.8049 | B( 1-Co, 13-C ) :  | 0.2444  |
| B( 1-Co, 29-O ) :  | 0.1439  | B( 1-Co, 30-O ) :  | 0.1574 | B( 1-Co, 31-O ) :  | 0.1234  |
| B( 2-Co, 3-Co) :   | 0.2623  | B( 2-Co, 5-Co) :   | 0.3151 | B( 2-Co, 6-Co) :   | 0.2366  |
| B( 2-Co, 12-C ) :  | 1.1847  | B( 2-Co, 13-C ) :  | 1.1779 | B( 2-Co, 14-C ) :  | 0.8742  |
| B( 2-Co, 15-C ) :  | 0.1722  | B( 2-Co, 32-O ) :  | 0.1516 | B( 2-Co, 33-O ) :  | 0.1631  |
| B( 2-Co, 34-O ) :  | 0.1448  | B( 3-Co, 4-Co) :   | 0.3239 | B( 3-Co, 6-Co) :   | 0.3157  |
| B( 3-Co, 7-Co) :   | 0.3234  | B( 3-Co, 15-C ) :  | 1.1765 | B( 3-Co, 16-C ) :  | 1.1560  |
| B( 3-Co, 17-C ) :  | 0.8043  | B( 3-Co, 19-C ) :  | 0.2441 | B( 3-Co, 35-O ) :  | 0.1578  |
| B( 3-Co, 36-O ) :  | 0.1442  | B( 3-Co, 37-O ) :  | 0.1242 | B( 4-Co, 7-Co) :   | 0.3163  |
| B( 4-Co, 8-Co) :   | 0.2382  | B( 4-Co, 10-C ) :  | 0.1603 | B( 4-Co, 18-C ) :  | 1.1871  |
| B( 4-Co, 19-C ) :  | 1.1795  | B( 4-Co, 20-C ) :  | 0.8840 | B( 4-Co, 38-O ) :  | 0.1514  |
| B( 4-Co, 39-O ) :  | 0.1627  | B( 4-Co, 40-O ) :  | 0.1458 | B( 5-Co, 6-Co) :   | 0.2605  |
| B( 5-Co, 8-Co) :   | 0.3255  | B( 5-Co, 14-C ) :  | 0.8033 | B( 5-Co, 21-C ) :  | 1.1568  |
| B( 5-Co, 22-C ) :  | 1.1747  | B( 5-Co, 27-C ) :  | 0.2479 | B( 5-Co, 34-O ) :  | 0.1238  |
| B( 5-Co, 41-O ) :  | 0.1441  | B( 5-Co, 42-O ) :  | 0.1577 | B( 6-Co, 7-Co) :   | 0.3273  |
| B( 6-Co, 17-C ) :  | 0.8735  | B( 6-Co, 22-C ) :  | 0.1733 | B( 6-Co, 23-C ) :  | 1.1718  |
| B( 6-Co, 24-C ) :  | 1.1864  | B( 6-Co, 37-O ) :  | 0.1448 | B( 6-Co, 43-O ) :  | 0.1636  |
| B( 6-Co, 44-O ) :  | 0.1518  | B( 7-Co, 8-Co) :   | 0.2588 | B( 7-Co, 20-C ) :  | 0.7971  |
| B( 7-Co, 23-C ) :  | 0.2618  | B( 7-Co, 25-C ) :  | 1.1781 | B( 7-Co, 26-C ) :  | 1.1551  |
| B( 7-Co, 40-O ) :  | 0.1223  | B( 7-Co, 45-O ) :  | 0.1580 | B( 7-Co, 46-O ) :  | 0.1439  |
| B( 8-Co, 11-C ) :  | 0.8770  | B( 8-Co, 25-C ) :  | 0.1618 | B( 8-Co, 27-C ) :  | 1.1792  |
| B( 8-Co, 28-C ) :  | 1.1865  | B( 8-Co, 31-O ) :  | 0.1453 | B( 8-Co, 47-O ) :  | 0.1632  |
| B( 8-Co, 48-O ) :  | 0.1516  | B( 9-C , 29-O ) :  | 2.1426 | B( 10-C , 30-O ) : | 2.0708  |
| B( 11-C , 31-O ) : | 1.9661  | B( 12-C , 32-O ) : | 2.1317 | B( 13-C , 33-O ) : | 2.0366  |

|                    |        |                    |        |                    |        |
|--------------------|--------|--------------------|--------|--------------------|--------|
| B( 14-C , 34-O ) : | 1.9665 | B( 15-C , 35-O ) : | 2.0672 | B( 16-C , 36-O ) : | 2.1429 |
| B( 17-C , 37-O ) : | 1.9659 | B( 18-C , 38-O ) : | 2.1308 | B( 19-C , 39-O ) : | 2.0363 |
| B( 20-C , 40-O ) : | 1.9665 | B( 21-C , 41-O ) : | 2.1433 | B( 22-C , 42-O ) : | 2.0665 |
| B( 23-C , 43-O ) : | 2.0325 | B( 24-C , 44-O ) : | 2.1324 | B( 25-C , 45-O ) : | 2.0705 |
| B( 26-C , 46-O ) : | 2.1434 | B( 27-C , 47-O ) : | 2.0354 | B( 28-C , 48-O ) : | 2.1309 |

-----  
THERMOCHEMISTRY AT 298.15K  
-----

Temperature ... 298.15 K  
Pressure ... 1.00 atm  
Total Mass ... 1062.61 AMU

INNER ENERGY

Summary of contributions to the inner energy U:

|                                  |     |                    |                 |
|----------------------------------|-----|--------------------|-----------------|
| Electronic energy                | ... | -13670.85693865 Eh |                 |
| Zero point energy                | ... | 0.17693682 Eh      | 111.03 kcal/mol |
| Thermal vibrational correction   | ... | 0.05686998 Eh      | 35.69 kcal/mol  |
| Thermal rotational correction    | ... | 0.00141627 Eh      | 0.89 kcal/mol   |
| Thermal translational correction | ... | 0.00141627 Eh      | 0.89 kcal/mol   |

-----  
Total thermal energy -13670.62029931 Eh

ENTHALPY

|                             |     |                    |               |
|-----------------------------|-----|--------------------|---------------|
| Total free energy           | ... | -13670.62029931 Eh |               |
| Thermal Enthalpy correction | ... | 0.00094421 Eh      | 0.59 kcal/mol |

-----  
Total Enthalpy ... -13670.61935510 Eh

ENTROPY

|                       |     |               |                |
|-----------------------|-----|---------------|----------------|
| Electronic entropy    | ... | 0.00065446 Eh | 0.41 kcal/mol  |
| Vibrational entropy   | ... | 0.10513140 Eh | 65.97 kcal/mol |
| Rotational entropy    | ... | 0.01825147 Eh | 11.45 kcal/mol |
| Translational entropy | ... | 0.02221834 Eh | 13.94 kcal/mol |

-----  
Final entropy term ... 0.14625567 Eh 91.78 kcal/mol

GIBBS FREE ENERGY

|                          |     |                    |                 |
|--------------------------|-----|--------------------|-----------------|
| Total enthalpy           | ... | -13670.61935510 Eh |                 |
| Total entropy correction | ... | -0.14625567 Eh     | -91.78 kcal/mol |

-----  
Final Gibbs free energy ... -13670.76561076 Eh

Cartesian coordinates of the optimized geometry of **5** in the quartet spin state.

|    |                   |                   |                   |
|----|-------------------|-------------------|-------------------|
| P  | -0.01088828652097 | 0.01487772096523  | -0.00439339725513 |
| Co | 1.50836707368441  | -0.34468015116940 | -1.61668435086094 |
| Co | -0.93625996832271 | -1.66888445672635 | -1.16803025383301 |
| Co | -2.08299122303946 | 0.71800898728679  | -0.50781784094415 |
| Co | 0.38006832335092  | 2.03575795591448  | -0.90220840526504 |
| Co | 1.02671866236049  | -1.89999122868067 | 0.53942971606799  |
| Co | -1.49219454621930 | -0.94828791466793 | 1.37662136885604  |
| Co | -0.51198424870604 | 1.59236063655493  | 1.51510503783517  |
| Co | 2.02260484366037  | 0.63427164657034  | 0.71981650130556  |
| C  | 2.34645819933881  | -1.63961656746772 | -2.49345722874278 |
| C  | 1.33242569708315  | 0.77353835202046  | -2.99267950943161 |
| C  | 3.16466152886216  | 0.25016000822043  | -0.80048336523836 |
| C  | -2.43021990322130 | -2.64920753377472 | -1.19092741966393 |
| C  | -0.52093817866093 | -1.75525257779849 | -2.91595825308129 |
| C  | 0.09027716132170  | -3.17277603555279 | -0.55435384097135 |
| C  | -2.67463285339409 | 0.08185630980471  | -2.06307842105850 |
| C  | -3.12777209860190 | 2.15091972990782  | -0.44721965219611 |
| C  | -3.18719290058414 | -0.21862098036428 | 0.77943986045074  |
| C  | 1.76299867980618  | 3.07887187754803  | -1.33931019050417 |
| C  | -0.80707231441765 | 2.62285381268548  | -2.11801078815083 |
| C  | -0.10077292998926 | 3.20088743359726  | 0.54726918627475  |

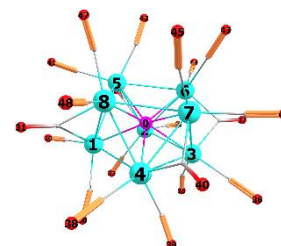

|   |                   |                   |                   |
|---|-------------------|-------------------|-------------------|
| C | 2.58111642194405  | -2.73111239375985 | 0.24765693395046  |
| C | 0.63573991633590  | -2.59413018500358 | 2.15161270725677  |
| C | -1.37633633537279 | -0.34158989350842 | 3.04706626432307  |
| C | -2.24111883030213 | -2.50984472403364 | 1.76218228783188  |
| C | 0.65552150841808  | 1.79820490164796  | 2.86776042305221  |
| C | -1.94100625102041 | 2.36180046269502  | 2.26305652776652  |
| C | 2.66973707686673  | -0.45112263649343 | 1.97520718508196  |
| C | 2.98522104123776  | 2.06054611771862  | 1.15246008573731  |
| O | 2.89240026636978  | -2.44965765731425 | -3.08827488594085 |
| O | 1.36006282166497  | 1.30975590921814  | -4.01071680970971 |
| O | 4.29172162118395  | 0.33535669657086  | -1.08375317181134 |
| O | -3.37987988719456 | -3.28215582216534 | -1.26191778447938 |
| O | -0.41510926483138 | -1.91840945733565 | -4.04680553815937 |
| O | 0.12855453059140  | -4.32196402256211 | -0.75352112455972 |
| O | -3.23031427795878 | -0.12703365420286 | -3.04911015753385 |
| O | -3.82112940834979 | 3.06045598754975  | -0.43844919812000 |
| O | -4.31539836316980 | -0.30304026993166 | 1.05881192157780  |
| O | 2.61796260963576  | 3.76602492804834  | -1.66260638736898 |
| O | -1.42477809685000 | 3.11933159671403  | -2.94770921681343 |
| O | -0.12908389805254 | 4.35008868814633  | 0.74837647831240  |
| O | 3.57243641841686  | -3.28496240393088 | 0.11285645344948  |
| O | 0.54891790361526  | -3.13565680348919 | 3.15941485519933  |
| O | -1.43466735235083 | -0.17862809844158 | 4.18508611266037  |
| O | -2.73057690784071 | -3.50395233702987 | 2.04559645672563  |
| O | 1.25486484789241  | 2.02028824734794  | 3.82060027496215  |
| O | -2.82272884500669 | 2.86391322224261  | 2.79024567017907  |
| O | 3.24855575198373  | -0.94345754714429 | 2.83971312871019  |
| O | 3.62815426435334  | 2.95670412357337  | 1.45499175412697  |

#### 4. Crystallographic details:

The crystallographic data for all described compounds were collected on an Xcalibur, Ruby, Gemini Ultra (Rigaku) with an AtlasS2 detector using Cu-K $\alpha$  (**3**,) or Mo-K $\alpha$  (**1**, **6**, **7**, **9**, **10**, **11**, **12**) radiation or an Agilent SuperNova diffractometer with Cu-K $\alpha$  (**5**, **8**) or Mo-K $\alpha$  (**2**, **4**) radiation. Data reduction and absorption correction were performed with the CrysAlisPro software package.<sup>[5]</sup> Structure solution and refinement was conducted in Olex2 (1.5 alpha)<sup>[6]</sup> with ShelXT<sup>[7]</sup> (solution) and ShelXL 2018/3<sup>[8]</sup> (least squares refinement (F2)). All non H atoms were refined with anisotropic displacement parameters and H atoms were treated as riding models with isotropic displacement parameters and fixed C-H bond lengths (sp<sup>3</sup>: 0.96 (CH<sub>3</sub>), 0.97 (CH<sub>2</sub>); sp<sup>2</sup>: 0.93 (CH)). Visualization of the crystal structures was performed with Olex2 (1.5-alpha).<sup>[6]</sup>

**Compound 1:** Compound **1** crystallizes from sublimation as colorless plate-shaped crystals with the monoclinic space group  $P2_1/c$ . The asymmetric unit contains one molecule of **1**.

**Compound 2:** Compound **2** crystallizes from concentrated *n*-hexane solutions at -25 °C as dark red block-shaped crystals with the monoclinic space group  $Cc$ . The asymmetric unit contains one molecule of **2**.

**Compound 3:** Compound **3** crystallizes from concentrated *n*-hexane solutions at -25 °C as dark violet block-shaped crystals with the triclinic space group  $P\bar{1}$ . The asymmetric unit contains one molecule of **3**.

**Compound 4:** Compound **4** crystallizes from concentrated *n*-hexane solutions at -25 °C as black needle-shaped crystals with the monoclinic space group  $P2_1/n$ . The asymmetric unit contains one molecule of **4**.

**Compound 5:** Compound **5** crystallizes from concentrated CH<sub>2</sub>Cl<sub>2</sub> solutions at -25 °C as black plate-shaped crystals with the monoclinic space group  $P2_1/n$ . The asymmetric unit contains one molecule of **5**.

**Compound 6:** Compound **6** crystallizes from concentrated toluene solutions at -25 °C as black plate-shaped crystals with the triclinic space group  $P\bar{1}$ . The asymmetric unit contains one molecule of **6**.

**Compound 7:** Compound **7** crystallizes from concentrated *n*-hexane solutions at 8 °C as black block-shaped crystals with the monoclinic space group  $P2_1/n$ . The asymmetric unit contains one molecule of **7**. Disorder of two of the CO ligands was treated with appropriate restraints.

**Compound 8:** Compound **8** crystallizes from concentrated *n*-hexane solutions at -25 °C as black needle-shaped crystals with the orthorhombic space group  $P2_12_12_1$ . The asymmetric unit contains one molecule of **8**. However, poor crystal quality did only allow for collection of an incomplete data set, proving the structure of **8**, but not allowing structural analysis in detail.

**Compound 9:** Compound **9** crystallizes from concentrated *n*-hexane/toluene mixtures at room temperature as black needle-shaped crystals with the monoclinic space group  $P2_1/c$ . The asymmetric unit contains half of a molecule of **9**.

**Compound 10:** Compound **10** crystallizes from concentrated toluene solutions at -25 °C as black block-shaped crystals with the monoclinic space group  $C2/c$ . The asymmetric unit contains half of a molecule of **10** as well as one toluene molecule.

**Compound 11:** Compound **11** crystallizes from concentrated toluene solutions at -25 °C as black block-shaped crystals with the monoclinic space group  $P2_1/n$ . The asymmetric unit contains one molecule of **11**. Notably, another polymorph of **11** has already been described in the literature.<sup>[9]</sup>

**Compound 12:** Compound **12** crystallizes from concentrated *n*-hexane solutions at -25 °C as black rod-shaped crystals with the monoclinic space group  $P2_1/n$ . The asymmetric unit contains one molecule of **12**. Notably, another polymorph of **12** has already been described in the literature.<sup>[10]</sup>

CCDC-2343202 (**1**), CCDC-2343203 (**2**), CCDC-2343204 (**3**), CCDC-2343205 (**4**), CCDC-2343206 (**5**), CCDC-2343207 (**6**), CCDC-2343208 (**7**), CCDC-2343817 (**8**), CCDC-2343209 (**9**), CCDC-2343210 (**10**), CCDC-2343211 (**11**) and CCDC-2343212 (**12**) contain the supplementary crystallographic data for this paper. These data can be obtained free of charge at [www.ccdc.cam.ac.uk/conts/retrieving.html](http://www.ccdc.cam.ac.uk/conts/retrieving.html) (or from the Cambridge Crystallographic Data Centre, 12 Union Road, Cambridge CB2 1EZ, UK; Fax: + 44-1223-336-033; email: [deposit@ccdc.cam.ac.uk](mailto:deposit@ccdc.cam.ac.uk)).

**Table S2.** Crystallographic data for compounds **1-4**.

| Compound                    | 1                                                | 2                                                   | 3                                                   | 4                                                   |
|-----------------------------|--------------------------------------------------|-----------------------------------------------------|-----------------------------------------------------|-----------------------------------------------------|
| CCDC-number                 | 2343202                                          | 2343203                                             | 2343204                                             | 2343205                                             |
| Formula                     | C <sub>5</sub> H <sub>3</sub> O <sub>5</sub> AsW | C <sub>14</sub> Co <sub>3</sub> CrO <sub>14</sub> P | AsC <sub>14</sub> Co <sub>3</sub> O <sub>14</sub> W | C <sub>13</sub> Co <sub>3</sub> FeO <sub>13</sub> P |
| $D_{calc.}/g \cdot cm^{-3}$ | 2.938                                            | 2.066                                               | 2.578                                               | 2.099                                               |
| $\mu/mm^{-1}$               | 16.307                                           | 23.837                                              | 30.063                                              | 26.413                                              |
| Formula Weight              | 401.84                                           | 651.90                                              | 827.70                                              | 627.74                                              |
| Colour                      | colourless                                       | dark red                                            | black                                               | black                                               |
| Shape                       | block-shaped                                     | block-shaped                                        | block-shaped                                        | needle-shaped                                       |
| Size/mm <sup>3</sup>        | 0.24×0.11×0.05                                   | 0.38×0.24×0.01                                      | 0.27×0.20×0.13                                      | 0.10×0.05×0.02                                      |
| $T/K$                       | 123.00(14)                                       | 123(1)                                              | 123.00(14)                                          | 123(1)                                              |
| Crystal System              | monoclinic                                       | monoclinic                                          | triclinic                                           | monoclinic                                          |
| Space Group                 | $P2_1/c$                                         | $Cc$                                                | $P\bar{1}$                                          | $P2_1/n$                                            |
| $a/\text{\AA}$              | 10.8246(9)                                       | 15.2345(6)                                          | 8.7183(4)                                           | 8.7530(8)                                           |
| $b/\text{\AA}$              | 6.7417(4)                                        | 8.8120(2)                                           | 9.0608(4)                                           | 15.645(2)                                           |
| $c/\text{\AA}$              | 12.5789(8)                                       | 17.3130(8)                                          | 14.8480(6)                                          | 14.5092(18)                                         |
| $\alpha/^\circ$             | 90                                               | 90                                                  | 73.230(4)                                           | 90                                                  |
| $\beta/^\circ$              | 98.184(7)                                        | 115.611(4)                                          | 83.682(3)                                           | 90.447(9)                                           |

|                             |              |              |              |              |
|-----------------------------|--------------|--------------|--------------|--------------|
| $\gamma/^\circ$             | 90           | 90           | 71.781(4)    | 90           |
| $V/\text{\AA}^3$            | 908.61(11)   | 2095.85(15)  | 1066.47(8)   | 1986.9(4)    |
| $Z$                         | 4            | 4            | 2            | 4            |
| $Z'$                        | 1            | 1            | 1            | 1            |
| Wavelength/ $\text{\AA}$    | 0.71073      | 1.54178      | 1.54178      | 1.54178      |
| Radiation type              | MoK $\alpha$ | CuK $\alpha$ | CuK $\alpha$ | CuK $\alpha$ |
| $\theta_{\min}/^\circ$      | 3.437        | 5.668        | 3.109        | 4.155        |
| $\theta_{\max}/^\circ$      | 29.349       | 76.435       | 66.554       | 72.995       |
| Measured Refl.              | 3854         | 7526         | 13064        | 7542         |
| Independent Refl.           | 2109         | 3528         | 3737         | 3758         |
| Reflections with $I > 2(I)$ | 1521         | 3460         | 3647         | 2631         |
| $R_{\text{int}}$            | 0.0611       | 0.0405       | 0.0449       | 0.0518       |
| Parameters                  | 110          | 299          | 298          | 280          |
| Restraints                  | 9            | 8            | 0            | 0            |
| Largest Peak                | 2.337        | 1.159        | 3.112        | 0.773        |
| Deepest Hole                | -3.081       | -0.853       | -2.293       | -0.666       |
| GooF                        | 1.057        | 1.085        | 1.072        | 1.017        |
| $wR_2$ (all data)           | 0.1336       | 0.1565       | 0.0963       | 0.1324       |
| $wR_2$                      | 0.1157       | 0.1558       | 0.0951       | 0.1179       |
| $R_1$ (all data)            | 0.0837       | 0.0574       | 0.0364       | 0.0779       |
| $R_1$                       | 0.0563       | <i>Cc</i>    | 0.0356       | 0.0483       |
| Flack Parameter             | /            | 0.114(10)    | /            | /            |

**Table S3.** Crystallographic data for compounds **5-8**.

| Compound                                         | 5                                                 | 6                                                 | 7                                                              | 8                                                              |
|--------------------------------------------------|---------------------------------------------------|---------------------------------------------------|----------------------------------------------------------------|----------------------------------------------------------------|
| CCDC-number                                      | 2343206                                           | 2343207                                           | 2343208                                                        | 2343817                                                        |
| Formula                                          | C <sub>20</sub> Co <sub>8</sub> O <sub>20</sub> P | C <sub>20</sub> Co <sub>7</sub> O <sub>20</sub> P | C <sub>24</sub> Co <sub>9</sub> O <sub>24</sub> P <sub>3</sub> | C <sub>21</sub> Co <sub>9</sub> O <sub>21</sub> P <sub>3</sub> |
| $D_{\text{calc.}}/\text{g} \cdot \text{cm}^{-3}$ | 2.413                                             | 2.158                                             | 2.216                                                          | 2.314                                                          |
| $\mu/\text{mm}^{-1}$                             | 35.960                                            | 3.801                                             | 3.953                                                          | 34.790                                                         |
| Formula Weight                                   | 1062.61                                           | 1003.68                                           | 1295.52                                                        | 1211.49                                                        |
| Colour                                           | black                                             | black                                             | black                                                          | black                                                          |
| Shape                                            | plate-shaped                                      | plate-shaped                                      | block-shaped                                                   | needle-shaped                                                  |
| Size/ $\text{mm}^3$                              | 0.15×0.07×0.02                                    | 0.19×0.10×0.04                                    | 0.37×0.09×0.05                                                 | 0.13×0.04×0.02                                                 |
| $T/\text{K}$                                     | 123(1)                                            | 123.1(6)                                          | 123.00(14)                                                     | 123(1)                                                         |
| Crystal System                                   | monoclinic                                        | triclinic                                         | monoclinic                                                     | orthorhombic                                                   |
| Space Group                                      | $P2_1/n$                                          | $P\bar{1}$                                        | $P2_1/n$                                                       | $P2_12_12_1$                                                   |
| $a/\text{\AA}$                                   | 9.8425(3)                                         | 8.6584(4)                                         | 9.4707(3)                                                      | 9.8379(8)                                                      |
| $b/\text{\AA}$                                   | 17.5260(6)                                        | 11.0824(4)                                        | 18.8780(6)                                                     | 12.6588(6)                                                     |
| $c/\text{\AA}$                                   | 16.9685(5)                                        | 17.4356(5)                                        | 21.9690(6)                                                     | 27.9292(18)                                                    |
| $\alpha/^\circ$                                  | 90                                                | 91.480(3)                                         | 90                                                             | 90                                                             |
| $\beta/^\circ$                                   | 92.151(3)                                         | 96.904(3)                                         | 98.605(2)                                                      | 90                                                             |
| $\gamma/^\circ$                                  | 90                                                | 111.126(4)                                        | 90                                                             | 90                                                             |
| $V/\text{\AA}^3$                                 | 2925.00(16)                                       | 1544.96(11)                                       | 3883.6(2)                                                      | 3478.2(4)                                                      |
| $Z$                                              | 4                                                 | 2                                                 | 4                                                              | 4                                                              |
| $Z'$                                             | 1                                                 | 1                                                 | 1                                                              | 1                                                              |
| Wavelength/ $\text{\AA}$                         | 1.54178                                           | 0.71073                                           | 0.71073                                                        | 1.54178                                                        |
| Radiation type                                   | CuK $\alpha$                                      | MoK $\alpha$                                      | MoK $\alpha$                                                   | CuK $\alpha$                                                   |
| $\theta_{\min}/^\circ$                           | 3.627                                             | 2.963                                             | 2.862                                                          | 4.715                                                          |

|                             |        |        |        |            |
|-----------------------------|--------|--------|--------|------------|
| $\theta_{max}/^\circ$       | 73.100 | 29.489 | 29.507 | 66.482     |
| Measured Refl.              | 9758   | 40289  | 39370  | 5650       |
| Independent Refl.           | 5602   | 7792   | 9514   | 3964       |
| Reflections with $I > 2(I)$ | 4396   | 6325   | 8458   | 3451       |
| $R_{int}$                   | 0.0629 | 0.0486 | 0.0337 | 0.0459     |
| Parameters                  | 442    | 433    | 577    | 487        |
| Restraints                  | 0      | 0      | 54     | 24         |
| Largest Peak                | 0.989  | 1.193  | 0.838  | 1.213      |
| Deepest Hole                | -1.056 | -0.649 | -0.632 | -1.432     |
| GooF                        | 1.036  | 1.044  | 1.270  | 1.013      |
| $wR_2$ (all data)           | 0.1740 | 0.0953 | 0.0965 | 0.1663     |
| $wR_2$                      | 0.1585 | 0.0886 | 0.0940 | 0.1574     |
| $R_1$ (all data)            | 0.0808 | 0.0571 | 0.0515 | 0.0688     |
| $R_1$                       | 0.0641 | 0.0407 | 0.0439 | 0.0609     |
| Flack Parameter             | /      | /      | /      | -0.026(11) |

**Table S4.** Crystallographic data for compounds **9-12**.

| Compound                                  | 9                                                               | 10                                                                              | 11                                                              | 12                                                |
|-------------------------------------------|-----------------------------------------------------------------|---------------------------------------------------------------------------------|-----------------------------------------------------------------|---------------------------------------------------|
| CCDC-number                               | 2343209                                                         | 2343210                                                                         | 2343211                                                         | 2343212                                           |
| Formula                                   | C <sub>26</sub> Co <sub>10</sub> O <sub>26</sub> P <sub>4</sub> | C <sub>44</sub> H <sub>16</sub> Co <sub>16</sub> O <sub>30</sub> P <sub>6</sub> | As <sub>3</sub> C <sub>24</sub> Co <sub>9</sub> O <sub>24</sub> | AsC <sub>20</sub> Co <sub>7</sub> O <sub>20</sub> |
| $D_{calc.}/\text{g} \cdot \text{cm}^{-3}$ | 2.267                                                           | 2.177                                                                           | 2.436                                                           | 2.271                                             |
| $\mu/\text{mm}^{-1}$                      | 4.061                                                           | 4.147                                                                           | 6.351                                                           | 4.853                                             |
| Formula Weight                            | 1441.44                                                         | 2153.27                                                                         | 1427.37                                                         | 1047.63                                           |
| Colour                                    | black                                                           | black                                                                           | black                                                           | black                                             |
| Shape                                     | needle-shaped                                                   | cube-shaped                                                                     | block-shaped                                                    | plate-shaped                                      |
| Size/mm <sup>3</sup>                      | 0.22×0.14×0.01                                                  | 0.11×0.10×0.06                                                                  | 0.86×0.52×0.45                                                  | 0.50×0.16×0.05                                    |
| $T/\text{K}$                              | 123.00(14)                                                      | 122.9(5)                                                                        | 123.1(3)                                                        | 122.95(10)                                        |
| Crystal System                            | monoclinic                                                      | monoclinic                                                                      | monoclinic                                                      | monoclinic                                        |
| Space Group                               | $P2_1/c$                                                        | $C2/c$                                                                          | $P2_1/n$                                                        | $P2_1/n$                                          |
| $a/\text{\AA}$                            | 11.9865(5)                                                      | 27.660(3)                                                                       | 11.2417(4)                                                      | 8.7211(3)                                         |
| $b/\text{\AA}$                            | 10.2655(7)                                                      | 12.8188(10)                                                                     | 21.1186(6)                                                      | 31.9682(11)                                       |
| $c/\text{\AA}$                            | 17.7539(12)                                                     | 21.965(3)                                                                       | 16.6478(5)                                                      | 11.2058(4)                                        |
| $\alpha/^\circ$                           | 90                                                              | 90                                                                              | 90                                                              | 90                                                |
| $\beta/^\circ$                            | 104.824(5)                                                      | 122.486(16)                                                                     | 99.977(3)                                                       | 101.294(4)                                        |
| $\gamma/^\circ$                           | 90                                                              | 90                                                                              | 90                                                              | 90                                                |
| $V/\text{\AA}^3$                          | 2111.9(2)                                                       | 6569.6(15)                                                                      | 3892.6(2)                                                       | 3063.65(19)                                       |
| $Z$                                       | 2                                                               | 4                                                                               | 4                                                               | 4                                                 |
| $Z'$                                      | 1                                                               | 0.5                                                                             | 1                                                               | 1                                                 |
| Wavelength/ $\text{\AA}$                  | 0.71073                                                         | 0.71073                                                                         | 0.71073                                                         | 0.71073                                           |
| Radiation type                            | MoK $\alpha$                                                    | MoK $\alpha$                                                                    | MoK $\alpha$                                                    | MoK $\alpha$                                      |
| $\theta_{min}/^\circ$                     | 3.083                                                           | 3.064                                                                           | 3.430                                                           | 3.489                                             |
| $\theta_{max}/^\circ$                     | 29.432                                                          | 29.271                                                                          | 29.555                                                          | 29.567                                            |
| Measured Refl.                            | 17258                                                           | 19008                                                                           | 34708                                                           | 12863                                             |

|                             |        |        |        |        |
|-----------------------------|--------|--------|--------|--------|
| Independent Refl.           | 5151   | 7615   | 9816   | 6965   |
| Reflections with $I > 2(I)$ | 4194   | 5971   | 7529   | 6084   |
| $R_{int}$                   | 0.0406 | 0.0355 | 0.0795 | 0.0296 |
| Parameters                  | 298    | 423    | 541    | 433    |
| Restraints                  | 0      | 0      | 0      | 0      |
| Largest Peak                | 0.550  | 1.820  | 1.277  | 1.331  |
| Deepest Hole                | -0.475 | -0.500 | -1.163 | -0.683 |
| GooF                        | 1.045  | 1.017  | 1.015  | 1.069  |
| $wR_2$ (all data)           | 0.0681 | 0.0912 | 0.0976 | 0.0797 |
| $wR_2$                      | 0.0618 | 0.0844 | 0.0948 | 0.0757 |
| $R_1$ (all data)            | 0.0468 | 0.0571 | 0.0557 | 0.0393 |
| $R_1$                       | 0.0321 | 0.0385 | 0.0418 | 0.0320 |
| Flack Parameter             | /      | /      | /      | /      |

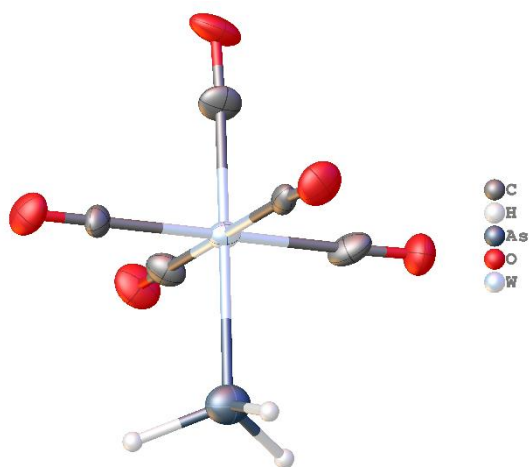

**Fig. S13.** View of the asymmetric unit of **1**.

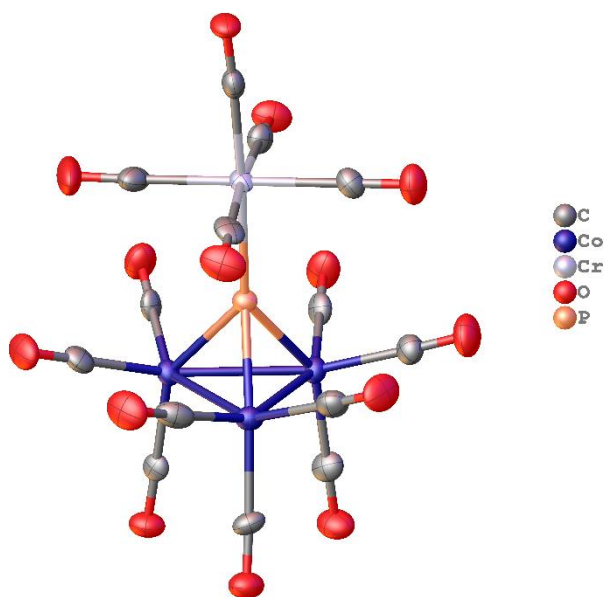

**Fig. S14.** View of the asymmetric unit of **2**.

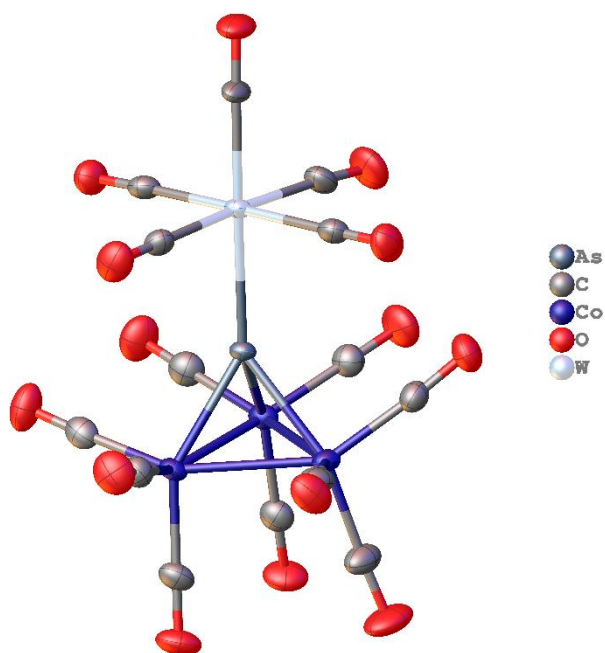

**Fig. S15.** View of the asymmetric unit of **3**.

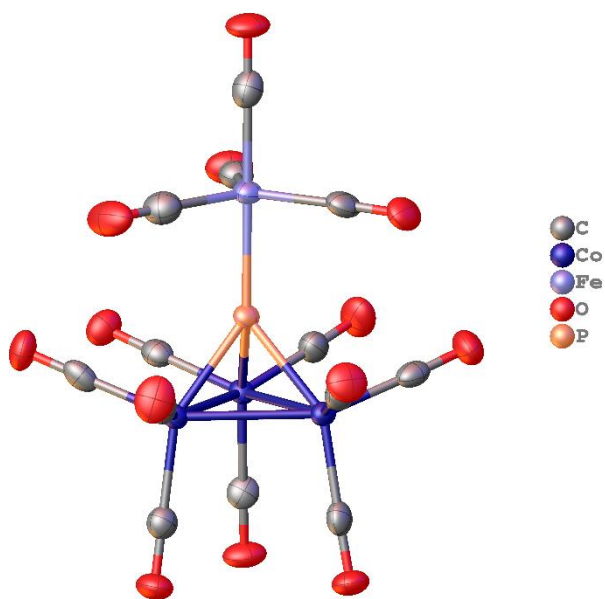

**Fig. S16.** View of the asymmetric unit of **4**.

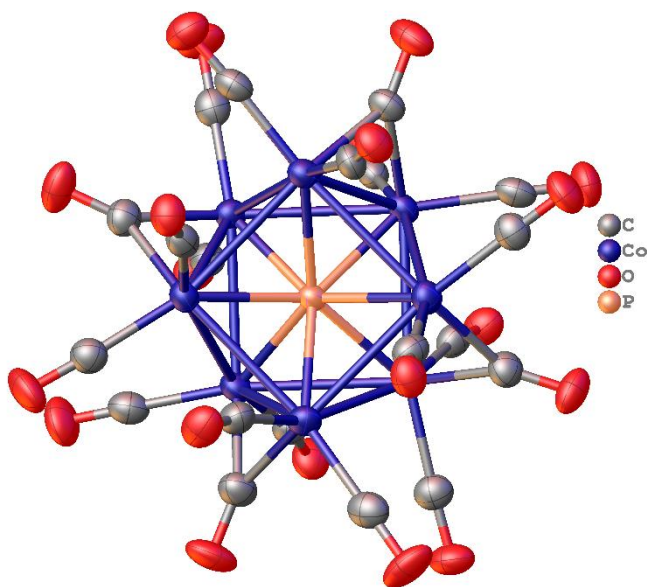

**Fig. S17.** View of the asymmetric unit of **5**.

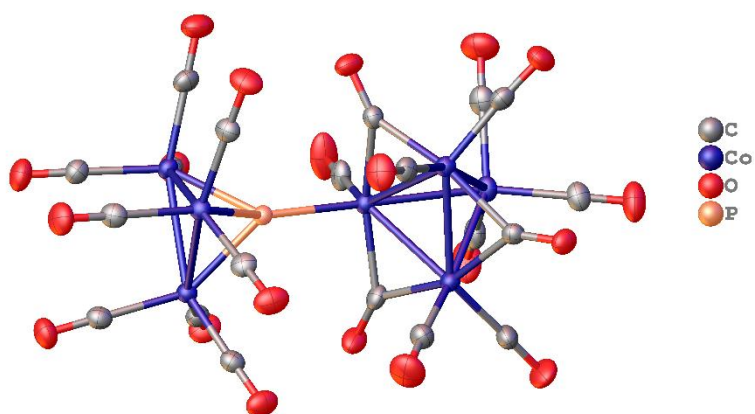

**Fig. S18.** View of the asymmetric unit of **6**.

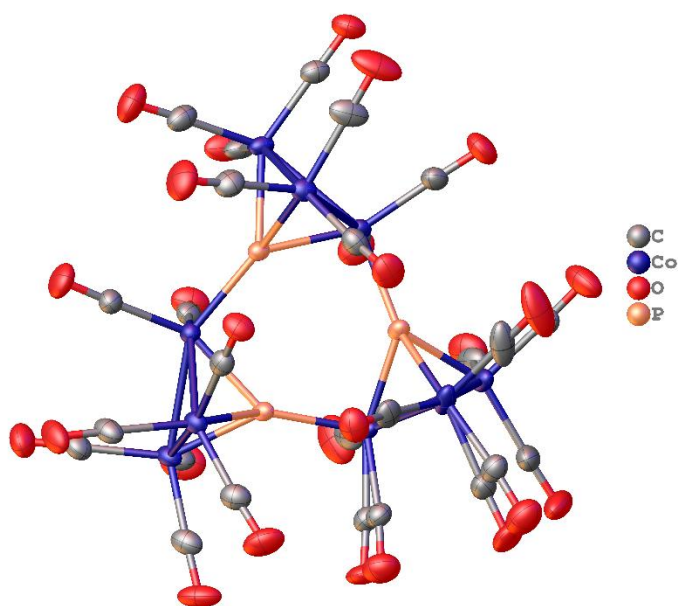

**Fig. S19.** View of the asymmetric unit of **7**.

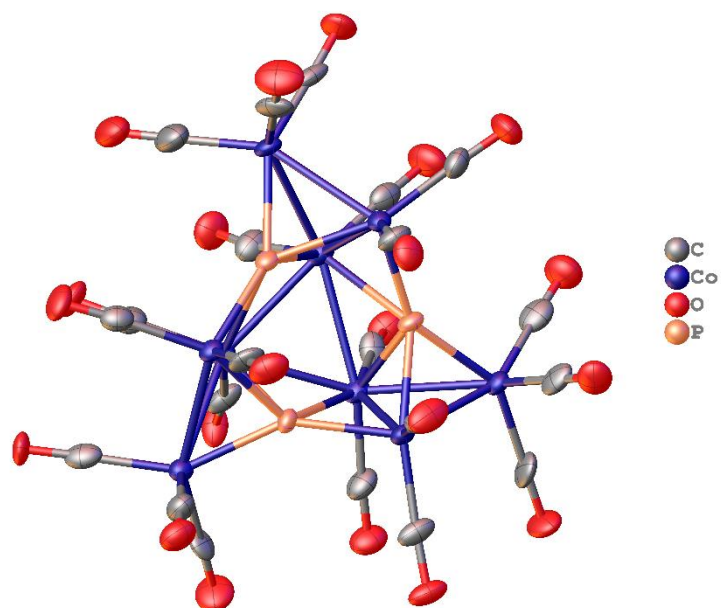

**Fig. S20.** View of the asymmetric unit of **8**.

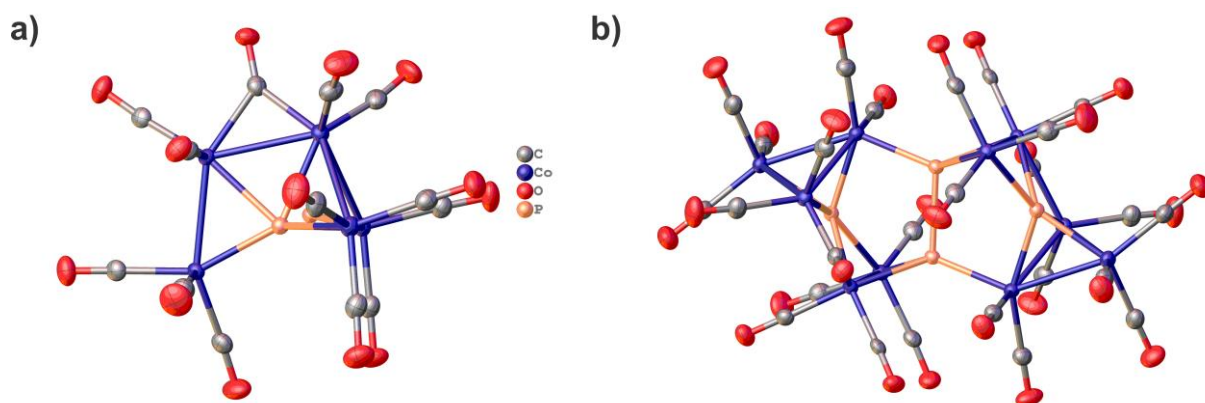

**Fig. S21.** a) View of the asymmetric unit of **9**; b) Molecular structure of compound **9** in the solid state.

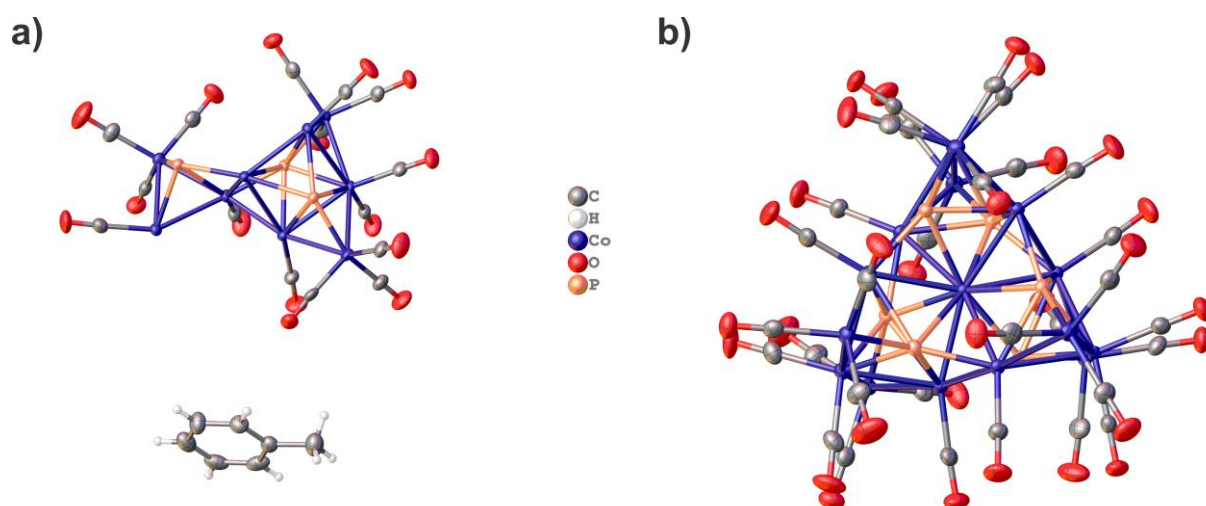

**Fig. S22.** a) View of the asymmetric unit of **10**; b) Molecular structure of compound **10** in the solid state.

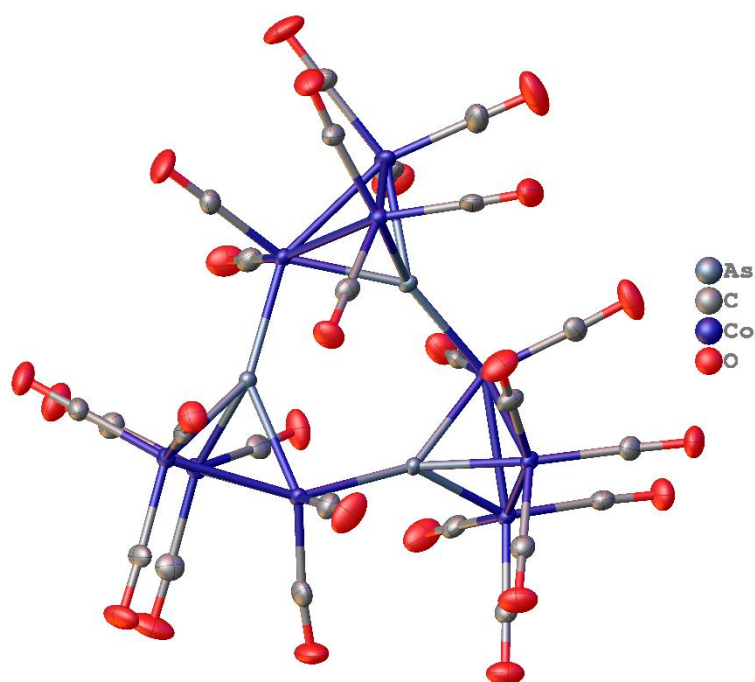

**Fig. S23.** View of the asymmetric unit of **11**.

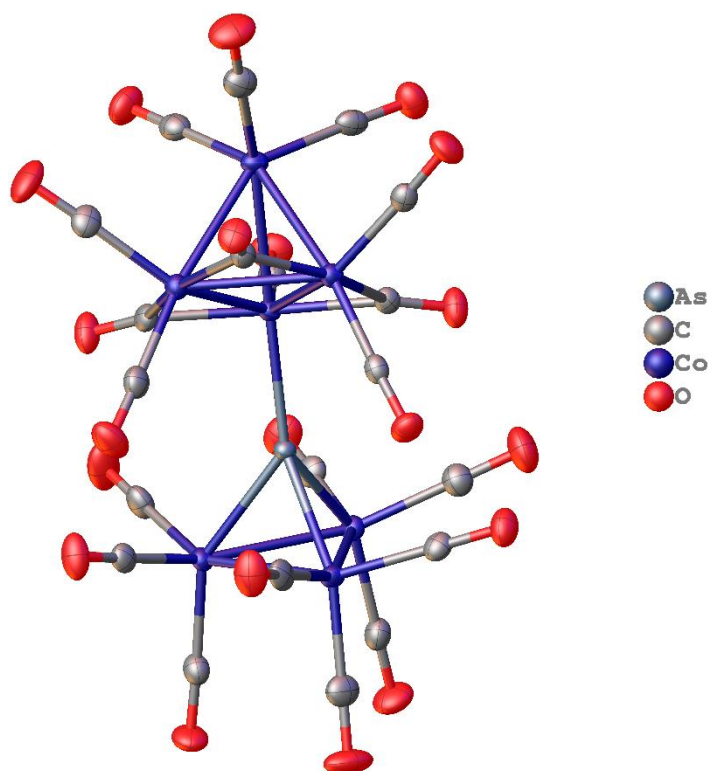

**Fig. S24.** View of the asymmetric unit of **12**.

## References:

- [1] a) R. A. Kendall, H. A. Früchtl, *Theor. Chem. Acc.* **1997**, 97, 158–163. b) F. Neese, *WIREs Comput. Mol. Sci.* **2012**, 2, 73–78. c) F. Neese, *WIREs Comput. Mol. Sci.* **2018**, 8, 1327.
- [2] S. Grimme, A. Hansen, S. Ehlert, J.-M. Mewes, *J. Chem. Phys.* **2021**, 154, 064103.
- [3] H. Kruse, S. Grimme, *J. Chem. Phys.* **2012**, 136, 154101.
- [4] E. Caldeweyher, C. Bannwarth, S. Grimme, *J. Chem. Phys.* **2017**, 147, 034112.
- [5] Agilent Technologies Ltd, *CrysAlis PRO*, Yarnton, Oxfordshire, England, **2014**.
- [6] O. V. Dolomanov, L. J. Bourhis, R. J. Gildea, J. A. K. Howard and H. Puschmann, *J. Appl. Crystallogr.* **2009**, 42, 339–341.
- [7] G. M. Sheldrick, *Acta Cryst. A* **2015**, 71, 3–8.
- [8] a) G. M. Sheldrick, *Acta Cryst. A* **2008**, 64, 112–122; b) G. M. Sheldrick, *Acta Cryst. C* **2015**, 71, 3–8.
- [9] A. V.-Orosz, V. Galamb, G. Pályi, L. Markó, *J. Organomet. Chem.* **1976**, 107, 235–240.
- [10] H. Lang, G. Huttner, B. Sigwarth, I. Jibril, L. Zsolnai, O. Orama, *J. Organomet. Chem.* **1986**, 304, 137–155.
